# Supplementary material
Source: Springer Nature journal article supplement (https://www.springermedizin.de/resource/supplementary/12889_2010_3135_MOESM1_ESM.pdf/9488280)
Supplement: MOESM1 [file 9488280]

THE STOCKHOLM PUBLIC HEALTH COHORT OF 2002-2007  
The survey was sent to a random sample of 50 000 residents in Stockholm 2002

Responders of the 2002 survey alive and still living in Stockholm County in 2007 received the follow-up questionnaire (n=31,182)

23,794 individuals answered

13,377 women

10,417 men

463 men with missing information on tobacco use, weight or height

9,954 men in the final analytical sample

5,422 never smokers

4,532 any smoking during life-time
